# Supplementary material for: Human Papillomavirus 16, 18, 31 and 45 viral load, integration and methylation status stratified by cervical disease stage
Source: PubMed Central journal article supplement (PMC4053304; doi:10.1186/1471-2407-14-384), 2014-05-30
Supplement: 1471-2407-14-384-S1.pdf [file 1471-2407-14-384-S1.pdf]

Supplementary Table S1 – PCR primer and probe sequences

| Parameter   | Target          | Region            | Name            | Location (5' - 3')                 | Sequence (5' - 3')                      | Size              |
|-------------|-----------------|-------------------|-----------------|------------------------------------|-----------------------------------------|-------------------|
| DNA VL      | HPV16           | E6                | E6 For (1)      | 382-407                            | CAAACCGTTGTGTGATTTGTTAATTA              | 89                |
|             |                 |                   | E6 Rev (1)      | 448-470                            | GCTTTTTGTCCAGATGTCTTTGC                 |                   |
|             |                 |                   | E6 Probe (1)    | 410-445                            | TGTATTAAGTGTCAAAGCCACTGTGTCTGGAAGAA (7) |                   |
|             | HPV18           | E6                | 18 F (2)        | 507-525                            | AGAGGCCAGTGCCATTCGT                     | 65                |
|             |                 |                   | 18 R (2)        | 551-571                            | GTTTCTCTGCGTGGTGGAGT                    |                   |
|             |                 |                   | 18 P (2)        | 526-547                            | TCCTGTCGTGCTCGGTTGCAGC (7)              |                   |
|             | HPV31           | E6                | 31 F (2)        | 479-502                            | ATTCCACAACATAGGAGGAAGGTG                | 76                |
|             |                 |                   | 31 R (2)        | 531-554                            | CACCTGGGTTTCAGTACGAGGTCT                |                   |
|             |                 |                   | 31 P (2)        | 504-528                            | ACAGGACGTTGCATAGCATGTTGGA (7)           |                   |
|             | HPV45           | E6                | 45 F (2)        | 495-517                            | GGACAGTACCGAGGGCAGTGTAA                 | 71                |
| 45 R (2)    |                 |                   | 543-565         | TCCCTACGTCTGCGAAGTCTTTC            |                                         |                   |
| 45 P (2)    |                 |                   | 520-541         | CATGTTGTGACCAGGCACGGCA (7)         |                                         |                   |
| Cell        | GAPDH           | GAPDH forward (3) | 2040-2921       | GGACTGAGGCTCCCACCTTT               | 188                                     |                   |
|             |                 | GAPDH reverse (3) | 3089-3108       | GCATGGACTGTGGTCTGCAA               |                                         |                   |
|             |                 | HT probe (3)      | 2943-2966       | CATCCAAGACTGGCTCCTCCCTGC (7)       |                                         |                   |
| Methylation | PE              |                   | A FW (4)        | 7829-7851                          | TTGTAAAATTGTATATGGGTGTG (9)             | 193               |
|             |                 |                   | A REV (4)       | 94-117                             | AAATCCTAAAACATTACAATTCTC (8), (9)       |                   |
|             |                 |                   | 400 S1 (4)      | 9-30                               | AATTTATGTATAAAAATTAAGGG (10)            |                   |
|             |                 |                   | 400 S2 (4)      | 7838-7858                          | TGTATATGGGTGTGTGTAAT (10)               |                   |
|             | 5'-LCR          |                   | B FW (4)        | 7459-4781                          | GGTTGTATGTTTTTGGTATAAA (9)              | 263               |
|             |                 |                   | B REV (4)       | 7692-7721                          | AAAACAAACCAAAAATATATACCTAACAC (8), (9)  |                   |
|             |                 |                   | 500 S1 (4)      | 7510-7529                          | GTAATTATGGTTAAATTTG (10)                |                   |
|             | 5'-LCR          |                   | 500 S2 (4)      | 7645-7664                          | ATTGTGTTATATAAAAATAAA (10)              | 281               |
|             |                 |                   | 700 (4)         | 7211-7230                          | GTATGTGTTTGTAAATATTA (8), (9)           |                   |
|             |                 |                   | C REV (4)       | 7491-7468                          | AAAAACACATTTTATACCAAAAAA (9)            |                   |
|             | 3'-L1           |                   | 600 (4)         | 7463-7482                          | TTTTATACCAAAAAACATAC (10)               | 390               |
|             |                 |                   | D FW (4)        | 6974-6996                          | TTGGGAAGTAAATTTAAAGGAAA (9)             |                   |
|             |                 |                   | D REV (4)       | 7340-7363                          | AATAACCACAACACAATTAATAAA (8), (9)       |                   |
|             | 3'-L1           |                   | 1000 (4)        | 7011-7030                          | TTAGATTAGTTTTTTTTAGG (10)               | 386               |
|             |                 |                   | E FW (4)        | 6975-6994                          | TGGGAAGTAAATTTAAAGGA (8), (9)           |                   |
|             |                 |                   | E REV (4)       | 7340-7360                          | AACCACAACACAATTAATAAA (9)               |                   |
|             | 3'-L1/5'-LCR    |                   | 800 (4)         | 7147-7166                          | TACATACAATACTTACAAC (10)                | 315               |
|             |                 |                   | F FW (4)        | 7049-7072                          | AGTAGGATTGAAGTTAAATTA (9)               |                   |
|             |                 |                   | F REV (4)       | 7340-7363                          | AATAACCACAACACAATTAATAAA (8), (9)       |                   |
|             | 5'-LCR          |                   | 700 (4)         | 7211-7230                          | GTATGTGTTTGTAAATATTA (10)               | 468               |
| 900 (4)     |                 |                   | 7067-7086       | ATTAAAATTTATATTAGGAA (10)          |                                         |                   |
| Msp10F (5)  |                 |                   | 7280-7303       | TAAAATATGTTTTGTGGTTTTGTG           |                                         |                   |
| HPV18       | PE / 5'-E6      | Msp10R (5)        | 7721-7747       | ATAATTATACAAACCAATATACAATT         | 291                                     |                   |
|             |                 | Msp8F (5)         | 7753-7781       | TGTTTAAATATTTGTTTATTTTAAATATG      |                                         |                   |
|             |                 | Msp8R (5)         | 161-786         | TATCTTACAATAAAATATTCAATTCC         |                                         |                   |
| 3'-L1       |                 | 18 E FWD (6)      | 6968-6997       | AAAGGAAAAGTTTTTTTAGATTTAGATTA      | 221                                     |                   |
|             |                 | 18 E REV (6)      | 7163-7188       | ACAAAACATACAAACACAACAATAAA         |                                         |                   |
| HPV31       | 3'-L1           | 31 L FWD (6)      | 6908-6935       | AAAGAAAAGTTTTTTGTAGATTTAGATT       | 205                                     |                   |
|             |                 | 31 L REV (6)      | 7087-7112       | ACACAAACACATACACATACAAACAC         |                                         |                   |
| HPV45       | 3'-L1 5'-LCR    | 45 L FWD (6)      | 6954-6976       | GTTTTGGATTGTTGATTTAAAGG            | 336                                     |                   |
|             |                 | 45 L REV (6)      | 7264-7289       | ATAACACCATACATACCACAAAACAC         |                                         |                   |
| Integration | HPV16           | E6                | (1)             | -                                  | same for DNA VL, above                  | 132               |
|             |                 |                   | E2-5'           | 16 E2-5 FWD (6)                    | 2852-2873                               |                   |
|             | E2-3'           | 16 E2-5 REV (6)   | 2959-2983       | GTTGCAGTTCAATTGCTTGAATGC           | 104                                     |                   |
|             |                 | 16 E2-3 FWD (6)   | 3683-3704       | <sup>18</sup> ATTGTATACTGCAGTGTGTC |                                         |                   |
|             | E2-3'           | 16 E2-3 REV (6)   | 3767-3786       | GTCACGTTGCCATTCATAT                | -                                       |                   |
|             |                 | (2)               | -               | same for DNA VL, above             |                                         |                   |
|             | HPV18           | E2-5'             | 18 E2-5 FWD (6) | 3109-3128                          | TGCAAGACACATGCGAGGAA                    | 157               |
|             |                 |                   | 18 E2-5 REV (6) | 3244-3265                          | CATGTTCTGCATCAGTCATAT                   |                   |
|             |                 |                   | 18 E2-3 FWD (6) | 3632-3652                          | TACAGGCAACAACAAAAGACG                   |                   |
|             | E2-3'           | 18 E2-3 REV (6)   | 3789-3808       | CCTGTTTTTTCATTGCCTGC               | 177                                     |                   |
|             |                 | (2)               | -               | same for DNA VL, above             |                                         |                   |
|             |                 | HPV31             | E2-5'           | 31 E2-5 FWD (6)                    |                                         | 2650-2671         |
|             | 31 E2-5 REV (6) |                   |                 | 2691-2712                          | CGTTGAGAAAGAGTCTCCATCG                  |                   |
|             | 31 E2-3 FWD (6) |                   |                 | 3429-3448                          | CAAGAACAGAGCCAGAGCAC                    |                   |
|             | E2-3'           | 31 E2-3 REV (6)   | 3487-3506       | AGTTGACACTGTCCACGGAG               | 78                                      |                   |
|             |                 | (2)               | -               | same for DNA VL, above             |                                         |                   |
| HPV45       |                 | E2-5'             | 45 E2-5 FWD (6) | 2752-2768                          |                                         | AGATTTGCACGAGGACG |
|             | 45 E2-5 REV (6) |                   | 2776-2790       | CCTCGGTGTCTGCA                     |                                         |                   |
|             | 45 E2-3 FWD (6) |                   | 3843-3860       | GTACAAATCTCGGTGGGA                 |                                         |                   |
| E2-3'       | 45 E2-3 REV (6) | 3960-3974         | AAGCGGACATTGCA  | 132                                |                                         |                   |

(1) Oligonucleotide derived from the literature (Lanham et al., 2001).

(2) Oligonucleotide derived from the literature (Lindh et al., 2007).

(3) Oligonucleotide derived from the literature (Payan et al., 2007).

(4) Oligonucleotide derived from the literature (Rajeevan et al., 2006).

(5) Oligonucleotide derived from the literature (Turan et al., 2006).

(6) Oligonucleotide designed in house.

(7) Oligonucleotide modified as follows: 5'-FAM, 3'-TAMRA.

(8) Oligonucleotide modified as follows: 5'-biotin.

(9) Oligonucleotide used for amplification.

(10) Oligonucleotide used for pyrosequencing.
